# Supplementary material for: Comprehensive assessment of the disputed RET Y791F variant shows no association with medullary thyroid carcinoma susceptibility
Source: PubMed Central journal article supplement (PMC4289937; doi:10.1530/erc-14-0491), 2015-02

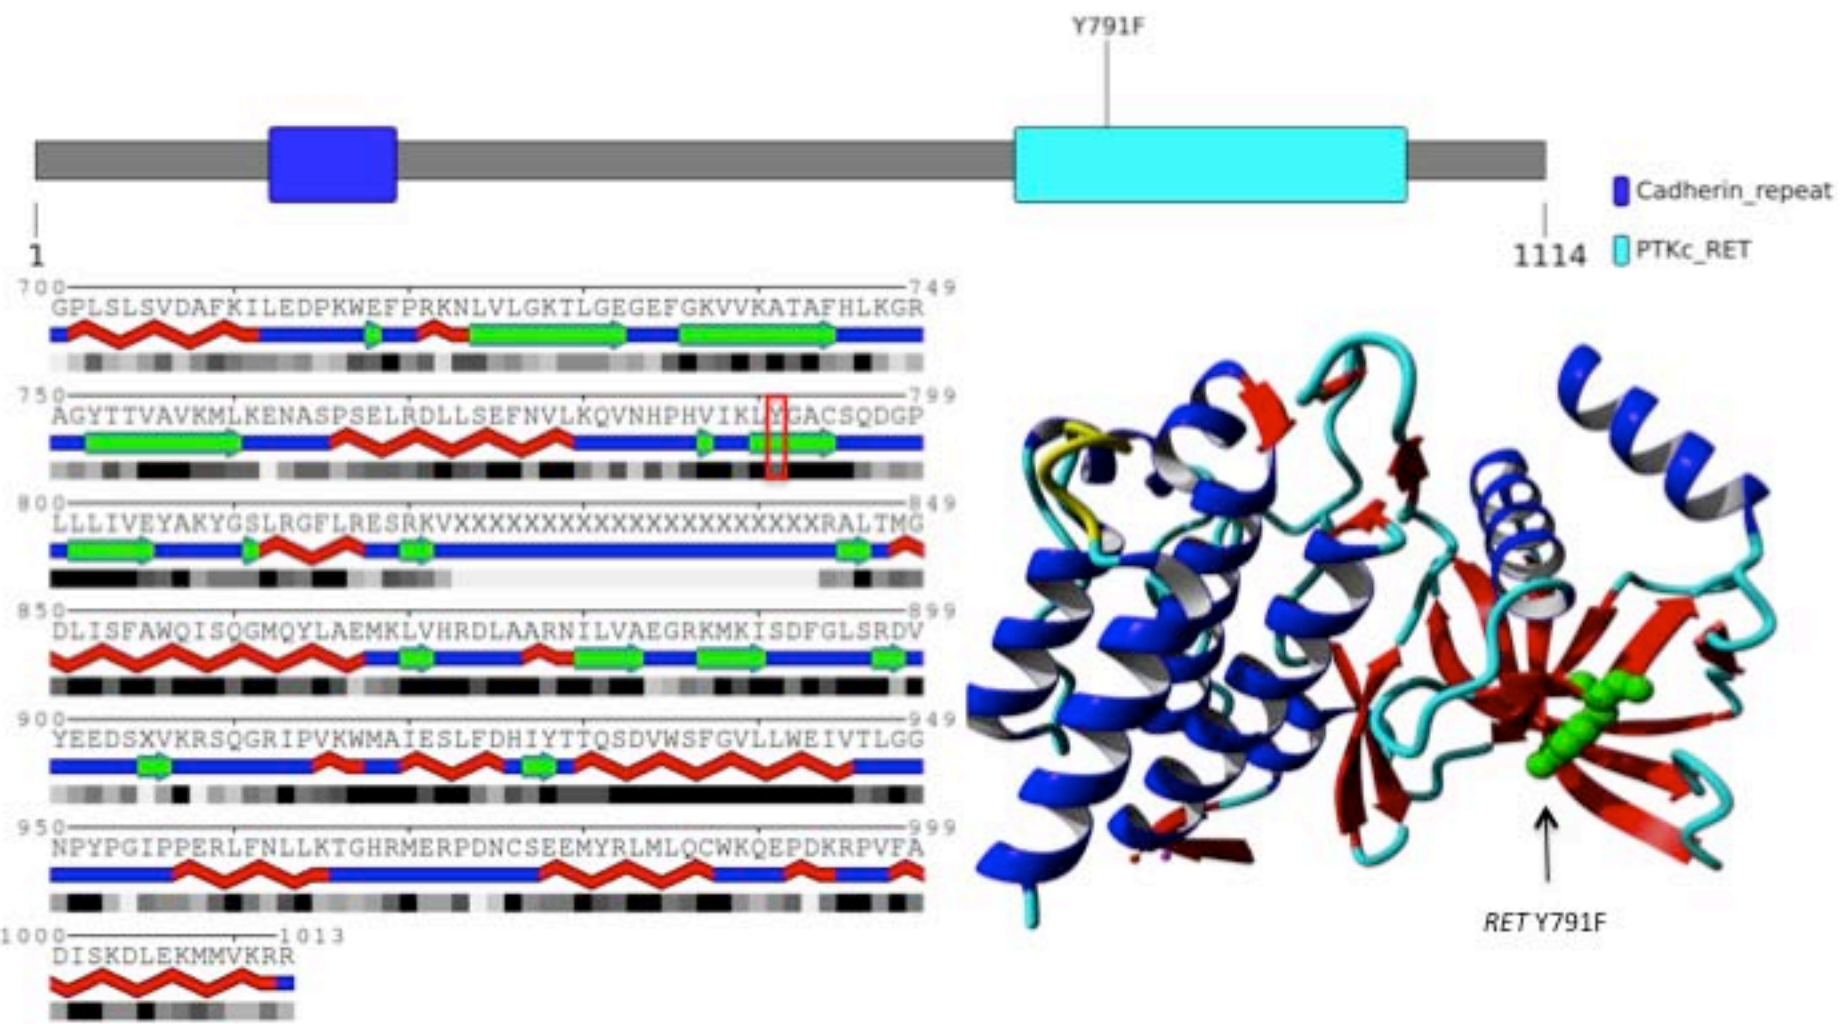

Supplement: supp_ERC-14-0491_Supplementary_figure_3.pdf [file supp_ERC-14-0491_Supplementary_figure_3.pdf]
